# Supplementary material for: Tracking Cancer Genetic Evolution using OncoTrack
Source: PubMed Central journal article supplement (PMC4944131; doi:10.1038/srep29647), 2016-07-14
Supplement: srep29647-s1.pdf [file srep29647-s1.pdf]

# Tracking Cancer Genetic Evolution using OncoTrack

Asoke K. Talukder<sup>1\*</sup>, Mahima Agarwal<sup>2</sup>, Kenneth H. Buetow<sup>3</sup>, Patrice P. Denèfle<sup>4</sup>

## Supplementary Information

### Supplementary Information 1: Bibliomic Analysis of Genes from Breast Cancer Comparative Analysis of SPKMG

We got 28 genes with adjusted p-values ranging from 6.3E-063 to 5.5E-018 from the breast cancer case/control comparative analysis. These genes with their individual p-values are, TCEAL5 (6.32E-63), PRB4 (1.39E-30), PRB2 (4.28E-29), SPRR2D (8.86E-24), FLG (2.33E-23), FAM47C (3.48E-23), MKI67 (3.48E-23), OTOP1 (1.08E-021), AHNAK (1.15E-021), OR10A2 (3.9E-21), MYH1 (4.97E-21), CSH2 (1.05E-20), SPRR2B (1.14E-20), GH2 (4.25E-20), CSH1 (5.69E-20), TCEAL6 (5.90E-20), KIR3DL1 (1.01E-19), MAGEC1 (4.49E-19), KRT33A (5.16E-19), OR10G8 (2.11E-18), RFPL1 (2.39E-18), MAGEA3 (2.39E-18), KRT6B (2.67E-18), PDE4DIP (3.83E-18), SPRR2F (5.18E-18), KRTAP21-1 (5.41E-18), IFNA21 (5.53E-18), and OR4A47 (5.53E-18).

Following are some of the other studies on these 28 genes,

1. TCEAL5 (Melanoma<sup>91</sup>, Pancreatic cancer<sup>92</sup>).
2. PRB4 (Esophageal adenocarcinoma<sup>93</sup>, Myeloproliferative neoplasm<sup>94</sup>, Melanoma<sup>91</sup>, Head and neck squamous cell carcinoma<sup>95</sup>)
3. PRB2 (Melanoma<sup>91</sup>, Pancreatic cancer<sup>92,96</sup>).
4. SPRR2D (Esophageal adenocarcinoma<sup>93</sup>, Melanoma<sup>91</sup>, Pancreatic cancer<sup>92</sup>).
5. FLG (Esophageal adenocarcinoma<sup>93</sup>, Pancreatic cancer<sup>97,92</sup>, Myeloproliferative neoplasm<sup>94</sup>, Melanoma<sup>91,98</sup>, Colorectal carcinoma<sup>99</sup>, Head and neck cancer<sup>98</sup>, Bronchus and Lung cancer<sup>98</sup>, Urinary cancer<sup>98</sup>, Nonmelanoma skin cancer<sup>98</sup>, Prostate cancer<sup>98,100</sup>, Breast

- 26 Cancer<sup>98</sup>, Colorectal cancer<sup>98</sup>).
- 27 6. FAM47C (Esophageal adenocarcinoma<sup>93</sup>, Myeloproliferative neoplasm<sup>94</sup>, Melanoma<sup>91</sup>,
- 28 Pancreatic cancer<sup>96</sup>, Prostate cancer<sup>100</sup>).
- 29 7. MKI67 (Esophageal adenocarcinoma<sup>93</sup>, Melanoma<sup>91</sup>, Colorectal carcinoma<sup>99,101</sup>, Pancreatic
- 30 cancer<sup>91</sup>, Prostate cancer<sup>102,94</sup>).
- 31 8. OTOP1 (Esophageal adenocarcinoma<sup>93</sup>, Pancreatic cancer<sup>97</sup>, Melanoma<sup>91</sup>, Lung cancer<sup>103</sup>,
- 32 Prostate cancer<sup>100</sup>).
- 33 9. AHNAK (Esophageal adenocarcinoma<sup>93</sup>, Myeloproliferative neoplasm<sup>94</sup>, Melanoma<sup>91</sup>, Head
- 34 and neck squamous cell carcinoma<sup>95</sup>, Pancreatic cancer<sup>92</sup>, Prostate cancer<sup>100</sup>).
- 35 10. OR10A2 (Melanoma<sup>91</sup>).
- 36 11. MYH1 (Esophageal adenocarcinoma<sup>93</sup>, Pancreatic cancer<sup>97</sup>, Myeloproliferative neoplasm<sup>94</sup>,
- 37 Melanoma<sup>91</sup>, Prostate cancer<sup>100</sup>).
- 38 12. CSH2 (Esophageal adenocarcinoma<sup>93</sup>, Melanoma<sup>91</sup>).
- 39 13. SPRR2B (Esophageal adenocarcinoma<sup>93</sup>, Melanoma<sup>91</sup>).
- 40 14. GH2 (Esophageal adenocarcinoma<sup>93</sup>, Melanoma<sup>91</sup>, Pancreatic cancer<sup>92</sup>).
- 41 15. CSH1 (Esophageal adenocarcinoma<sup>93</sup>, Melanoma<sup>91</sup>, Prostate cancer<sup>100</sup>).
- 42 16. TCEAL6 (Esophageal adenocarcinoma<sup>93</sup>, Melanoma<sup>91</sup>, Pancreatic cancer<sup>92</sup>, Prostate
- 43 cancer<sup>100</sup>).
- 44 17. KIR3DL1 (Melanoma<sup>91</sup>, Colorectal Cancer<sup>104,105</sup>, Pancreatic Cancer<sup>105</sup>, Gastric Cancer<sup>105</sup>).
- 45 18. MAGEC1 (Esophageal adenocarcinoma<sup>93</sup>, Melanoma<sup>91,106</sup>, Head and neck squamous cell
- 46 carcinoma<sup>95</sup>, Mantle cell lymphoma<sup>107</sup>, Pancreatic cancer<sup>96</sup>).
- 47 19. KRT33A (Esophageal adenocarcinoma<sup>93</sup>, Melanoma<sup>91</sup>, Prostate cancer<sup>100</sup>).
- 48 20. OR10G8 (Esophageal adenocarcinoma<sup>93</sup>, Melanoma<sup>91</sup>, Prostate cancer<sup>100</sup>).
- 49 21. RFPL1 (Melanoma<sup>91</sup>, Prostate cancer<sup>100</sup>, Colorectal cancer<sup>99</sup>).
- 50 22. MAGEA3 (Melanoma<sup>91</sup>, Colorectal cancer<sup>99</sup>, Gingivo-buccal oral squamous cell
- 51 carcinoma<sup>108</sup>, Neuroblastoma<sup>110</sup>).

- 52 23. KRT6B (Melanoma<sup>91</sup>, Lung adenocarcinoma<sup>109</sup>, Neuroblastoma<sup>110</sup>).
- 53 24. PDE4DIP (Melanoma<sup>91</sup>, Colorectal cancer<sup>99</sup>, Lung adenocarcinoma<sup>109</sup>, Gingivo-buccal oral
- 54 squamous cell carcinoma<sup>108</sup>, Neuroblastoma<sup>110</sup>, Chondrosarcoma<sup>111</sup>).
- 55 25. SPRR2F (Melanoma<sup>91</sup>, Colorectal cancer<sup>99</sup>).
- 56 26. KRTAP21-1 (Melanoma<sup>91</sup>, Colorectal cancer<sup>99</sup>, Lung adenocarcinoma<sup>109</sup>).
- 57 27. IFNA21 (Melanoma<sup>91</sup>, Colorectal cancer<sup>99</sup>, Lung adenocarcinoma<sup>109</sup>, Pancreatic cancer<sup>92</sup>).
- 58 28. OR4A47 (Melanoma<sup>91</sup>, Colorectal cancer<sup>99</sup>, Lung adenocarcinoma<sup>109</sup>, Neuroblastoma<sup>110</sup>).
- 59

60 **References:**

- 61 91. Berger, M.F. *et al.* Melanoma genome sequencing reveals frequent PREX2 mutations.
- 62 *Nature* **485**, 502-506 (2012).
- 63 92. Jones, S. *et al.* Core Signaling Pathways in Human Pancreatic Cancers Revealed by Global
- 64 Genomic Analyses. *Science (New York, NY)*. **321**, 1801-1806 (2008).
- 65 93. Dulak, A.M. *et al.* Exome and whole genome sequencing of esophageal adenocarcinoma
- 66 identifies recurrent driver events and mutational complexity. *Nature genetics* **45**, 10 (2013)
- 67 94. Nangalia, J. *et al.* Somatic CALR Mutations in Myeloproliferative Neoplasms with
- 68 Nonmutated JAK2. *N Engl J Med*. **369**, 2391-2405 (2013).
- 69 95. Stransky, N. *et al.* The Mutational Landscape of Head and Neck Squamous Cell Carcinoma.
- 70 *Science (New York, NY)*. **333**, 1157-1160 (2011)
- 71 96. Wu, J. *et al.* Whole-exome sequencing of neoplastic cysts of the pancreas reveals recurrent
- 72 mutations in components of ubiquitin-dependent pathways. *Proc Natl Acad Sci U S A*. **108**,
- 73 21188-21193 (2011).
- 74 97. Jiao, Y. *et al.* Whole Exome Sequencing of Pancreatic Neoplasms with Acinar
- 75 Differentiation. *J Pathol*. **232**, 428-435 (2014).
- 76 98. Skaaby, T. *et al.* Filaggrin loss-of-function mutations and incident cancer: a population-
- 77 based study. *Br J Dermatol* **171**, 1407-1414 (2014).

- 78 99. The Cancer Genome Atlas Network. Comprehensive Molecular Characterization of Human  
79 Colon and Rectal Cancer. *Nature*. **487**, 330-337 (2012).
- 80 100. Barbieri, C.E. *et al.* Exome sequencing identifies recurrent SPOP, FOXA1 and MED12  
81 mutations in prostate cancer. *Nature genetics*. **44**, 685-689 (2012).
- 82 101. Bass, A.J. *et al.* Genomic sequencing of colorectal adenocarcinomas identifies a recurrent  
83 VTI1A-TCF7L2 fusion. *Nat Genet*. **43**, 964-968 (2011).
- 84 102. Rizzardi, A.E. *et al.* Evaluation of protein biomarkers of prostate cancer aggressiveness.  
85 *BMC Cancer* **14**, 244 (2014).
- 86 103. Liu, J. *et al.* Genome and transcriptome sequencing of lung cancers reveal diverse  
87 mutational and splicing events. *Genome Res* **22**, 2315-2327 (2012).
- 88 104. Kim, H.J. *et al.* HLA-Cw polymorphism and killer cell immunoglobulin-like receptor  
89 (KIR) gene analysis in Korean colorectal cancer patients. *Int J Surg*. **12**, 815-820 (2014).
- 90 105. Peng, Y.P. *et al.* Comprehensive analysis of the percentage of surface receptors and  
91 cytotoxic granules positive natural killer cells in patients with pancreatic cancer, gastric  
92 cancer, and colorectal cancer. *J Transl Med* **11**, 262; DOI:10.1186/1479-5876-11-262 (2013).
- 93 106. Krauthammer, M. *et al.* Exome sequencing identifies recurrent somatic RAC1 mutations in  
94 melanoma. *Nat Genet*. **44**, 1006-1014 (2012).
- 95 107. Beà, S. *et al.* Landscape of somatic mutations and clonal evolution in mantle cell  
96 lymphoma. *Proc Natl Acad Sci U S A*. **110**, 18250-18255 (2013).
- 97 108. India Project Team of the International Cancer Genome Consortium. Mutational landscape  
98 of gingivo-buccal oral squamous cell carcinoma reveals new recurrently-mutated genes and  
99 molecular subgroups. *Nat Commun*. **4**, 2873; DOI:10.1038/ncomms3873 (2013).
- 100 109. Imielinski, M. *et al.* Mapping the hallmarks of lung adenocarcinoma with massively  
101 parallel sequencing. *Cell* **150**, 1107-1120 (2012).
- 102 110. Pugh, T.J. *et al.* The genetic landscape of high-risk neuroblastoma. *Nat Genet*. **45**, 279-284  
103 (2013).

104 111. Tarper P.S. *et al.* Frequent mutation of the major cartilage collagen gene COL2A1 in  
105 chondrosarcoma. *Nat Genet.* **45**, 923-926 (2013).

## 106 **Supplementary Information 2: Functional and Centrality Analysis of Breast** 107 **Cancer Mutual Information Network**

108 Functional enrichment analysis for 11 Breast cancer MI network key genes, along adjusted  
109 enrichment p-values returned the biological processes 'cell-cell adhesion' (adjusted p-value 6.5E-3),  
110 'cell adhesion' (adjusted p-value: 5.3E-3), and 'biological adhesion' (adjusted p-value: 3.6E-3).

111

### 112 **Centrality Analysis**

113 Centrality analysis of the breast cancer MI network was carried out using different centrality  
114 measures. The key genes identified from this analysis are:

- 115 1. Degree centrality: CSMD3, DCC, FLRT3, DIAPH3, SPAM1, ARHGAP24, DACH1, LIPI,  
116 BCHE, GLRB
- 117 2. Closeness centrality: DMD, ANO3, CXORF22, CSMD3, LRP1B, BRWD3, C12ORF50,  
118 GALNTL6, ZNF804A, C6ORF118
- 119 3. Betweenness centrality: CXORF22, C12ORF50, DMD, DSC2, CSMD3, LRP1B, ANO3,  
120 TRHDE, DCC, GCNT4
- 121 4. Eigenvector centrality: FLRT3, SPAM1, POF1B, GLRB, BCHE, OR13C8, PACRGL,  
122 HAS2, XIRP2, SLITRK6

123 The above list of 40 genes has a few common genes. After removal of these common genes, there  
124 are 28 unique genes that emerge as central from the different centrality analyses. These 28 genes are  
125 CSMD3, DCC, FLRT3, DIAPH3, SPAM1, ARHGAP24, DACH1, LIPI, BCHE, GLRB, DMD,  
126 ANO3, CXORF22, LRP1B, BRWD3, C12ORF50, GALNTL6, ZNF804A, C6ORF118, DSC2,  
127 TRHDE, GCNT4, POF1B, OR13C8, PACRGL, HAS2, XIRP2, SLITRK6. Of these, genes such as  
128 DCC, DIAPH3, ARHGAP24, BCHE, DMD, LRP1B, BRWD3, DSC2, and HAS2 are associated  
129 with metastasis and tumorigenesis<sup>112,113,114,115,116, 117, 118, 119, 120</sup>.

130

### 131 **References:**

- 132 112. Krimpenfort, P. *et al.* Deleted in colorectal carcinoma suppresses metastasis in p53-  
133 deficient mammary tumours. *Nature*. **482**, 538-41 (2012).
- 134 113. Di Vizio, D. *et al.* Oncosome formation in prostate cancer: association with a region of  
135 frequent chromosomal deletion in metastatic disease. *Cancer Res*. **69**, 5601-5609 (2009).
- 136 114. Feng, M. *et al.* RASAL2 activates RAC1 to promote triple-negative breast cancer  
137 progression. *J Clin Invest*. **124**, 5291-5304 (2014)
- 138 115. Battisti, V. *et al.* Cholinesterase activities and biochemical determinations in patients with  
139 prostate cancer: influence of Gleason score, treatment and bone metastasis. *Biomed*  
140 *Pharmacother*. **66**, 249-255 (2012).
- 141 116. Pantaleo, M.A. *et al.* Dystrophin deregulation is associated with tumor progression in  
142 KIT/PDGFR $\alpha$  mutant gastrointestinal stromal tumors. *Clin Sarcoma Res*. **4**, 9;  
143 DOI:10.1186/2045-3329-4-9 (2014).
- 144 117. Craig, D.W. *et al.* Genome and transcriptome sequencing in prospective metastatic triple-  
145 negative breast cancer uncovers therapeutic vulnerabilities. *Mol Cancer Ther*. **12**, 104-116  
146 (2013).
- 147 118. Eui Jin Suh *et al.* Comparative profiling of plasma proteome from breast cancer patients  
148 reveals thrombospondin-1 and BRWD3 as serological biomarkers. *Exp Mol Med*. **44**, 36-44  
149 (2012).
- 150 119. Fang, W.K. *et al.* Down-regulated desmocollin-2 promotes cell aggressiveness through  
151 redistributing adherens junctions and activating beta-catenin signalling in oesophageal  
152 squamous cell carcinoma. *J Pathol*. **231**, 257-270 (2013).
- 153 120. Wu, M. *et al.* A novel role of low molecular weight hyaluronan in breast cancer metastasis.  
154 *FASEB J*. **29**, 1290-1298 (2015).
- 155

156 **Supplementary Information 3: Common SNVs and InDels identified across**  
157 **all ESCC samples**

158 The rsIDs of the 20 common mutations across tumor and germline ESCC samples are given below.

159 Some mutations are associated with more than 1 rsID.

160 1. rs72559129, rs112595382

161 2. rs113322110; rs3214485

162 3. rs3827760

163 4. rs113934564, rs66744502

164 5. rs55765823

165 6. rs76159126, rs5872508

166 7. rs4535533

167 8. rs11402364, rs75544239

168 9. rs67335052, rs36008849

169 10. rs33914855; rs11411516

170 11. rs67530050, rs113178278

171 12. rs10897158

172 13. rs139455912, rs11455434

173 14. rs5795166, rs33936067

174 15. rs55912941, rs150851358

175 16. rs936212

176 17. rs3803354

177 18. rs1426654

178 19. rs57321480, rs75244038

179 20. rs56070390
